# Supplementary material for: Challenges and Alternatives to Evaluation Methods and Regulation Approaches for Medical Apps as Mobile Medical Devices: International and Multidisciplinary Focus Group Discussion
Source: PubMed Central journal article supplement (PMC11474120; doi:10.2196/54814), 2024-09-30
Supplement: jmir_v26i1e54814_app1.pdf [file jmir_v26i1e54814_app1.pdf]

## Multimedia Appendix 1: Coreq-Checklist

| Topic                                          | Item | Guide Questions/Description                                                                                                                              | Reported on Page |
|------------------------------------------------|------|----------------------------------------------------------------------------------------------------------------------------------------------------------|------------------|
| <b>Domain 1: Research team and reflexivity</b> |      |                                                                                                                                                          |                  |
| <i>Personal characteristics</i>                |      |                                                                                                                                                          |                  |
| Interviewer/facilitator                        | 1    | Which author/s conducted the interview or focus group?                                                                                                   | 6f               |
| Credentials                                    | 2    | What were the researcher's credentials? E.g. PhD, MD                                                                                                     | 7                |
| Occupation                                     | 3    | What was their occupation at the time of the study?                                                                                                      | 7                |
| Gender                                         | 4    | Was the researcher male or female?                                                                                                                       | 6f               |
| Experience and training                        | 5    | What experience or training did the researcher have?                                                                                                     | 7                |
| <i>Relationship with participants</i>          |      |                                                                                                                                                          |                  |
| Relationship established                       | 6    | Was a relationship established prior to study commencement?                                                                                              | N.A. (No)        |
| Participant knowledge of the interviewer       | 7    | What did the participants know about the researcher? e.g. personal goals, reasons for doing the research                                                 | 7                |
| Interviewer characteristics                    | 8    | What characteristics were reported about the interviewer/facilitator? e.g. Bias, assumptions, reasons and interests in the research topic                | 7                |
| <b>Domain 2: Study design</b>                  |      |                                                                                                                                                          |                  |
| <i>Theoretical framework</i>                   |      |                                                                                                                                                          |                  |
| Methodological Orientation and Theory          | 9    | What methodological orientation was stated to underpin the study? e.g. grounded theory, discourse analysis, ethnography, phenomenology, content analysis | 7ff              |
| <i>Participant selection</i>                   |      |                                                                                                                                                          |                  |
| Sampling                                       | 10   | How were participants selected? e.g. purposive, convenience, consecutive, snowball                                                                       | 6                |
| Method of approach                             | 11   | How were participants approached? e.g. face-to-face, telephone, mail, email                                                                              | 6                |
| Sample size                                    | 12   | How many participants were in the study?                                                                                                                 | 6                |
| Non-participation                              | 13   | How many people refused to participate or dropped out? Reasons?                                                                                          | 6                |
| <i>Setting</i>                                 |      |                                                                                                                                                          |                  |
| Setting of data collection                     | 14   | Where was the data collected? e.g. home, clinic, workplace                                                                                               | 6ff              |
| Presence of non-participants                   | 15   | Was anyone else present besides the participants and researchers?                                                                                        | 6                |
| Description of sample                          | 16   | What are the important characteristics of the sample? e.g. demographic data, date                                                                        | Table 2          |
| <i>Data collection</i>                         |      |                                                                                                                                                          |                  |
| Interview guide                                | 17   | Were questions, prompts, guides provided by the authors? Was it pilot tested?                                                                            | 7                |
| Repeat interviews                              | 18   | Were repeated interviews carried out? If yes, how many?                                                                                                  | N.A. (No)        |
| Audio/visual recording                         | 19   | Did the research use audio or visual recording to collect the data?                                                                                      | 7                |
| Field notes                                    | 20   | Were field notes made during and/or after the interview or focus group?                                                                                  | 7                |
| Duration                                       | 21   | What was the duration of the interviews or focus group?                                                                                                  | 7                |
| Data saturation                                | 22   | Was data saturation discussed?                                                                                                                           | N. A. (No)       |

| Topic                                  | Item | Guide Questions/Description                                                                                                     | Reported on Page                                                     |
|----------------------------------------|------|---------------------------------------------------------------------------------------------------------------------------------|----------------------------------------------------------------------|
| <b>Domain 2: Study design</b>          |      |                                                                                                                                 |                                                                      |
| <i>Data collection</i>                 |      |                                                                                                                                 |                                                                      |
| Transcripts returned                   | 23   | Were transcripts returned to participants for comment and/or correction?                                                        | N.A. (Yes, to those who joined the working group after the workshop) |
| Topic                                  | Item | Guide Questions/Description                                                                                                     | Reported on Page                                                     |
| <b>Domain 3: Analysis and findings</b> |      |                                                                                                                                 |                                                                      |
| <i>Data analysis</i>                   |      |                                                                                                                                 |                                                                      |
| Number of data coders                  | 24   | How many data coders coded the data?                                                                                            | 7                                                                    |
| Description of the coding tree         | 25   | Did authors provide a description of the coding tree?                                                                           | Textbox 2 & 3                                                        |
| Derivation of themes                   | 26   | Were themes identified in advance or derived from the data?                                                                     | 7                                                                    |
| Software                               | 27   | What software, if applicable, was used to manage the data?                                                                      | 7                                                                    |
| Participant checking                   | 28   | Did participants provide feedback on the findings?                                                                              | N. A. (Yes, those who joined the working group after the workshop)   |
| <i>Reporting</i>                       |      |                                                                                                                                 |                                                                      |
| Quotations presented                   | 29   | Were participant quotations presented to illustrate the themes/findings? Was each quotation identified? e.g. participant number | Textbox 2 & 3 (only the written statements from the flipcharts)      |
| Data and findings consistent           | 30   | Was there consistency between the data presented and the findings?                                                              | 9ff                                                                  |
| Clarity of major themes                | 31   | Were major themes clearly presented in the findings?                                                                            | 9f                                                                   |
| Clarity of minor themes                | 32   | Is there a description of diverse cases or discussion of minor themes?                                                          | 10ff                                                                 |
